# Supplementary material for: An examination of the impact of unmelted, melted, and deconstructed cheese on lipid metabolism: a 6-week randomised trial
Source: Royal Society of Chemistry journal article supplement (doi:10.1039/d4fo02708f), 2024-01-01
Supplement: d4fo02708f1.pdf [file d4fo02708f1.pdf]

**Supplemental table 1.** Differences in demographics and anthropometrics across intervention diets, (*n* 162, completer analysis).

|                                       | Unmelted cheese<br>( <i>n</i> 58) | Melted cheese<br>( <i>n</i> 53) | Deconstructed cheese<br>( <i>n</i> 51) | PV1 <sup>1</sup>   | PΔ <sup>2</sup> |
|---------------------------------------|-----------------------------------|---------------------------------|----------------------------------------|--------------------|-----------------|
| Age (years)                           | 57.9 ± 5.6                        | 58.8 ± 6.2                      | 58.6 ± 5.7                             | 0.672              | -               |
| Gender <i>n</i> (%)                   |                                   |                                 |                                        |                    |                 |
| Male                                  | 24 (42.1)                         | 25 (47.2)                       | 20 (39.2)                              | 0.708 <sup>3</sup> | -               |
| Female                                | 33 (57.9)                         | 28 (52.8)                       | 31 (60.8)                              |                    |                 |
| Weight (kg)                           |                                   |                                 |                                        | 0.749              | 0.569           |
| Visit 1                               | 82.0 ± 14.1                       | 83.9 ± 15.5                     | 82.1 ± 14.9                            |                    |                 |
| Visit 2                               | 81.7 ± 14.4                       | 83.5 ± 15.1                     | 82.0 ± 15.1                            |                    |                 |
| BMI (kg/m <sup>2</sup> )              |                                   |                                 |                                        | 0.963              | 0.556           |
| Visit 1                               | 28.7 ± 3.9                        | 28.7 ± 4.7                      | 28.8 ± 4.6                             |                    |                 |
| Visit 2                               | 28.6 ± 4.0                        | 28.6 ± 4.6                      | 28.8 ± 4.7                             |                    |                 |
| Body fat <sup>4</sup> (%)             |                                   |                                 |                                        | 0.992              | 0.610           |
| Visit 1                               | 34.4 ± 7.1                        | 34.5 ± 9.4                      | 34.6 ± 8.3                             |                    |                 |
| Visit 2                               | 34.0 ± 7.2                        | 34.4 ± 9.4                      | 34.4 ± 8.2                             |                    |                 |
| Waist circumference <sup>5</sup> (cm) |                                   |                                 |                                        | 0.647              | 0.570           |
| Visit 1                               | 93.9 ± 12.6                       | 97.0 ± 11.6                     | 95.0 ± 14.7                            |                    |                 |
| Visit 2                               | 94.0 ± 12.0                       | 94.4 ± 11.0                     | 94.1 ± 13.5                            |                    |                 |

Data presented as mean ± standard deviation, unless otherwise indicated.

<sup>1</sup> PV1, differences across groups for visit 1 calculated with 1-factor ANOVA or Kruskal-Wallis nonparametric ANOVA where appropriate.

<sup>2</sup> PΔ, differences across groups for delta values (visit 2 – visit 1) calculated with 1-factor ANOVA or Kruskal-Wallis nonparametric ANOVA where appropriate.

<sup>3</sup> Chi-square test.

<sup>4</sup> *n* 160 for body fat percentage.

<sup>5</sup> *n* 157 for waist circumference.

**Supplemental table 2.** Differences in biochemistry and blood pressure data across intervention diets, (*n* 162, completer analysis).

|                            | <b>Unmelted cheese<br/>(<i>n</i> 58)</b> | <b>Melted cheese<br/>(<i>n</i> 53)</b> | <b>Deconstructed cheese<br/>(<i>n</i> 51)</b> | <b>PV<sup>1</sup></b> | <b>PΔ<sup>2</sup></b> |
|----------------------------|------------------------------------------|----------------------------------------|-----------------------------------------------|-----------------------|-----------------------|
| Total cholesterol (mmol/L) |                                          |                                        |                                               | 0.782                 | 0.152                 |
| Visit 1                    | 5.71 ± 0.85                              | 5.79 ± 0.89                            | 5.67 ± 0.92                                   |                       |                       |
| Visit 2                    | 5.75 ± 0.91                              | 5.99 ± 0.94                            | 5.72 ± 0.93                                   |                       |                       |
| HDL cholesterol (nmol/L)   |                                          |                                        |                                               | 0.854                 | 0.583                 |
| Visit 1                    | 1.62 ± 0.42                              | 1.67 ± 0.45                            | 1.65 ± 0.47                                   |                       |                       |
| Visit 2                    | 1.65 ± 0.49                              | 1.73 ± 0.51                            | 1.70 ± 0.47                                   |                       |                       |
| LDL cholesterol (mmol/L)   |                                          |                                        |                                               | 0.894                 | 0.384                 |
| Visit 1                    | 3.51 ± 0.80                              | 3.55 ± 0.75                            | 3.48 ± 0.76                                   |                       |                       |
| Visit 2                    | 3.53 ± 0.80                              | 3.65 ± 0.72                            | 3.45 ± 0.76                                   |                       |                       |
| VLDL cholesterol (mmol/L)  |                                          |                                        |                                               | 0.524                 | 0.234                 |
| Visit 1                    | 0.51 ± 0.27                              | 0.52 ± 0.39                            | 0.48 ± 0.21                                   |                       |                       |
| Visit 2                    | 0.51 ± 0.22                              | 0.55 ± 0.33                            | 0.51 ± 0.23                                   |                       |                       |
| Triglycerides (mmol/L)     |                                          |                                        |                                               | 0.380                 | 0.196                 |
| Visit 1                    | 1.26 ± 0.61                              | 1.25 ± 0.90                            | 1.19 ± 0.50                                   |                       |                       |
| Visit 2                    | 1.27 ± 0.51                              | 1.35 ± 0.73                            | 1.25 ± 0.55                                   |                       |                       |
| Glucose (mmol/L)           |                                          |                                        |                                               | 0.395                 | 0.462                 |
| Visit 1                    | 5.58 ± 0.53                              | 5.66 ± 0.75                            | 5.48 ± 0.70                                   |                       |                       |
| Visit 2                    | 5.49 ± 0.69                              | 5.60 ± 0.86                            | 5.62 ± 0.87                                   |                       |                       |
| Insulin (mU/L)             |                                          |                                        |                                               | 0.749                 | 0.639                 |
| Visit 1                    | 8.18 ± 4.58                              | 7.85 ± 4.75                            | 7.14 ± 3.54                                   |                       |                       |
| Visit 2                    | 7.96 ± 4.29                              | 7.34 ± 4.68                            | 7.49 ± 4.37                                   |                       |                       |
| SBP (mmHg)                 |                                          |                                        |                                               | 0.987                 | 0.852                 |
| Visit 1                    | 133.0 ± 18.6                             | 133.5 ± 17.3                           | 133.7 ± 16.1                                  |                       |                       |
| Visit 2                    | 129.2 ± 18.6                             | 129.1 ± 15.5                           | 128.3 ± 13.6                                  |                       |                       |

|            |             |             |            |       |       |
|------------|-------------|-------------|------------|-------|-------|
| DBP (mmHg) |             |             |            | 0.549 | 0.671 |
| Visit 1    | 87.1 ± 10.1 | 87.5 ± 10.2 | 85.5 ± 9.4 |       |       |
| Visit 2    | 85.6 ± 10.8 | 86.2 ± 8.9  | 83.5 ± 9.3 |       |       |

---

Data presented as mean ± standard deviation.

Abbreviations: DBP, diastolic blood pressure; HDL, high-density lipoprotein; LDL, low-density lipoprotein; SBP, systolic blood pressure.

<sup>1</sup> PV1, differences across groups for visit 1 calculated with 1-factor ANOVA or Kruskal-Wallis nonparametric ANOVA where appropriate.

<sup>2</sup> PΔ, differences across groups for delta values (visit 2 – visit 1) calculated with general linear models controlling for baseline values, sex, age, weight change, change in SFA intake as a % of TE and change in protein as a % of TE. Post hoc analysis was conducted via Fisher's least significant difference (LSD) test.

**Supplemental table 3.** Differences in dietary data across intervention diets (*n* 156, completer analysis).

|                             | <b>Unmelted cheese<br/>(<i>n</i> 55)</b> | <b>Melted cheese<br/>(<i>n</i> 52)</b> | <b>Deconstructed cheese<br/>(<i>n</i> 49)</b> | <b>PV1</b>         | <b>PΔ</b>           |
|-----------------------------|------------------------------------------|----------------------------------------|-----------------------------------------------|--------------------|---------------------|
| Energy (kcal/day)           |                                          |                                        |                                               | 0.610              | 0.638               |
| Visit 1                     | 2184 ± 804                               | 2109 ± 813                             | 2335 ± 1686                                   |                    |                     |
| Visit 2                     | 1803 ± 640                               | 1847 ± 764                             | 2191 ± 1246                                   |                    |                     |
| Protein (% of total energy) |                                          |                                        |                                               | 0.662              | <0.001 <sup>3</sup> |
| Visit 1                     | 17.3 ± 3.1                               | 17.3 ± 3.0                             | 16.8 ± 3.1                                    |                    |                     |
| Visit 2                     | 19.2 ± 3.4                               | 19.3 ± 4.4                             | 14.7 ± 3.2                                    |                    |                     |
| Fat (% of total energy)     |                                          |                                        |                                               | 0.046 <sup>4</sup> | 0.863               |
| Visit 1                     | 38.7 ± 5.6                               | 39.1 ± 5.9                             | 41.4 ± 5.8                                    |                    |                     |
| Visit 2                     | 40.6 ± 7.7                               | 40.9 ± 4.5                             | 43.5 ± 7.5                                    |                    |                     |
| SFA (% of total energy)     |                                          |                                        |                                               | 0.080              | 0.192               |
| Visit 1                     | 15.4 ± 3.6                               | 15.5 ± 3.3                             | 16.9 ± 3.9                                    |                    |                     |
| Visit 2                     | 16.9 ± 5.4                               | 16.8 ± 4.7                             | 19.9 ± 5.7                                    |                    |                     |
| CHO (% of total energy)     |                                          |                                        |                                               | 0.180              | 0.088               |
| Visit 1                     | 43.5 ± 5.7                               | 43.5 ± 6.6                             | 41.3 ± 7.5                                    |                    |                     |
| Visit 2                     | 39.6 ± 11.0                              | 39.7 ± 9.4                             | 42.1 ± 8.3                                    |                    |                     |

Data presented as mean ± standard deviation.

Abbreviations: CHO, carbohydrate; kcal, kilocalories; SFA, saturated fatty acid.

<sup>1</sup> PV1, differences across groups for visit 1 calculated with 1-factor ANOVA or Kruskal-Wallis nonparametric ANOVA where appropriate.

<sup>2</sup> PΔ, differences across groups for delta values (visit 2 – visit 1) calculated with 1-factor ANOVA or Kruskal-Wallis nonparametric ANOVA where appropriate.

<sup>3</sup> Significant differences Δ protein intake as a percentage of total energy intake between groups A and C (P<0.001) and groups B and C (P<0.001).

<sup>4</sup> Significant differences in fat intake at visit 1 as a percentage of total energy intake between groups A and C (P=0.019).
